# Supplementary material
Source: ML conference proceedings conference paper supplement (https://openreview.net/forum?id=pLcSrn8NpJ)
Supplement: supplementary_material [file attachment]

## 423 A Proof of Theorem 1

424 In this section, we establish a proof of Theorem 1, and all the required lemmas stated in Section 4.  
 425 We fix a finite  $p \geq 1$ , a  $\sigma \in \mathbb{R}_+^G$ , and  $T \geq 2G$ .

### 426 A.1 Properties of $R_{p,T}$

427 The goal of this section is to establish the necessary analytical properties of  $R_{p,T}$ . Let  $\Delta(G)$  be the  
 428 set of distributions on  $[G]$ , and  $\mathcal{K}$  be the projection of  $\Delta(G)$  in  $\mathbb{R}_+^{G-1}$ :

$$\mathcal{K} := \left\{ \lambda \in [0, 1]^{G-1} \mid \sum_g \lambda_g \leq 1 \right\}. \quad (12)$$

429  $\mathcal{K}$  is also the  $G - 1$ -dimensional unit simplexe. For each vector  $n \in \mathbb{R}_+^G$  with  $\sum_{t=1}^T n_g = T$ , we set  
 430 for each  $g \in [G - 1]$   $\lambda_g := \frac{n_g}{T}$ . We have  $\lambda \in \mathcal{K}$ . Moreover, we have from (1):

$$R_{p,T}(n, \sigma) = \left\| \left\{ \frac{\sigma_g^2}{n_g} \right\}_{g=1}^G \right\|_p = \frac{1}{T} \left\| \left\{ \frac{\sigma_1^2}{\lambda_1}, \dots, \frac{\sigma_{G-1}^2}{\lambda_{G-1}}, \frac{\sigma_G^2}{1 - \lambda_1 - \dots - \lambda_{G-1}} \right\} \right\|_p. \quad (13)$$

431 which motivates us to introduce the re-scaled function  $r$ :

$$r_p : \lambda \in \mathcal{K} \rightarrow r(\lambda) := \left\| \left\{ \frac{\sigma_1^2}{\lambda_1}, \dots, \frac{\sigma_{G-1}^2}{\lambda_{G-1}}, \frac{\sigma_G^2}{1 - \lambda_1 - \dots - \lambda_{G-1}} \right\} \right\|_p. \quad (14)$$

432 so that (13) can be written as

$$R_{p,T}(n, \sigma) = \frac{1}{T} r_p(\lambda). \quad (15)$$

433 From the definition of  $\mathcal{K}$  in (12), the interior of  $\mathcal{K}$ , denoted  $\mathcal{K}^\circ$ , is

$$\mathcal{K}^\circ = \left\{ \lambda \in \mathcal{K} \mid \forall g \in [G - 1], \lambda_g > 0, \sum_{g \in [G-1]} \lambda_g < 1 \right\}.$$

434 Moreover, the function  $r$  is  $\mathcal{C}^3$  in  $\mathcal{K}^\circ$ . From Taylor's theorem, we have for  $\lambda, \lambda' \in \mathcal{K}^\circ$ :

$$\left| r_p(\lambda) - r_p(\lambda') - (\lambda - \lambda') \nabla r_p(\lambda') - \frac{1}{2} \langle \mathcal{H}(\lambda')(\lambda - \lambda'), \lambda - \lambda' \rangle \right| \leq \|\lambda - \lambda'\|_\infty^3 \sup_{\substack{u \in [\lambda, \lambda'] \\ x, y, z \in \mathbb{N} \\ x+y+z=3 \\ \{g, h, i\} \subset [G-1]}} \left| \frac{1}{x!y!z!} \frac{\partial^3 r_p(u)}{\partial \lambda_g \partial \lambda_h \partial \lambda_i} \right| \quad (16)$$

435 where  $\nabla, \mathcal{H}$  are respectively the gradient and hessian operators. In what follows, we will derive  
 436 expressions for the relevant derivatives of  $r$  in (16).

437 **Lemma 7.** For  $g, h, i \in [G - 1]$ , we introduce the following functions in  $\mathcal{K}^\circ$ :

$$\begin{aligned} H_g : \lambda \in \mathcal{K}^\circ &\rightarrow \frac{\sigma_G^{2p}}{(1 - \lambda_1 - \dots - \lambda_{G-1})^{p+1}} - \frac{\sigma_g^{2p}}{\lambda_g^{p+1}} \\ G_{h,g} &:= \frac{1}{p+1} \frac{\partial}{\partial \lambda_g} H_h \\ I_{g,h,i} &:= \frac{1}{p+2} \frac{\partial}{\partial \lambda_i} G_{g,h} \end{aligned}$$

438 The following holds:

- 439 1.  $\nabla r_p = r_p^{1-p}(H_1, \dots, H_{G-1})$
- 440 2.  $\mathcal{H}_{g,h} = (1 - p)r_p^{1-2p}H_gH_h + (p+1)r_p^{1-p}G_{g,h}$

3.

$$\begin{aligned} \frac{\partial^3}{\partial \lambda_g \partial \lambda_h \partial \lambda_i} r_p &= (1-p)(1-2p)H_g H_h H_i r_p^{1-3p} \\ &\quad + (1-2p)(1+p)(H_g G_{h,i} + H_h G_{i,g} + H_g G_{h,i}) \\ &\quad + r_p^{1-2p} + (p+1)(p+2)I_{g,h,i} r_p^{1-p} \end{aligned}$$

441 *Proof.* Fix a  $\lambda \in \mathcal{K}^\circ$  and  $g, h, i \in [G-1]$ .

442 **Expression of the gradient:** On the one hand, we have from the definition of  $r_p$  in (14)

$$r_p^p(\lambda) = \left\| \left\{ \frac{\sigma_1^2}{\lambda_1}, \dots, \frac{\sigma_{G-1}^2}{\lambda_{G-1}}, \frac{\sigma_G^2}{1 - \lambda_1 - \dots - \lambda_{G-1}} \right\} \right\|_p^p = \sum_{h \leq G-1} \frac{\sigma_h^{2p}}{\lambda_h^p} + \frac{\sigma_G^{2p}}{(1 - \lambda_1 - \dots - \lambda_{G-1})^p},$$

443 so that

$$\frac{\partial}{\partial \lambda_g} (r_p^p)(\lambda) = p \frac{\sigma_G^{2p}}{(1 - \lambda_1 - \dots - \lambda_{G-1})^{p+1}} = p H_g(\lambda) \quad (17)$$

444 On the other hand, from the formula  $(f^p)' = pf'f^{p-1}$ , we have

$$\frac{\partial}{\partial \lambda_g} (r_p^p)(\lambda) = p r_p^{p-1}(\lambda) \frac{\partial}{\partial \lambda_g} r_p(\lambda) \quad (18)$$

445 By combining Equations (17) and (18), we obtain

$$\frac{\partial}{\partial \lambda_g} r_p^p = p H_g = p r_p^{p-1} \frac{\partial}{\partial \lambda_g} r_p$$

446 so that

$$\frac{\partial}{\partial \lambda_g} r_p = r_p^{1-p} H_g \quad (19)$$

447 Therefore  $\nabla r_p = \left( \frac{\partial}{\partial \lambda_1} r_p, \dots, \frac{\partial}{\partial \lambda_{G-1}} r_p \right) = r_p^{1-p}(H_1, \dots, H_{G-1})$ , which proves the first equation  
448 of Lemma 7.

449 **Expression of the Hessian:** We have

$$\begin{aligned} \mathcal{H}_{g,h} &= \frac{\partial^2}{\partial \lambda_g \partial \lambda_h} r_p \\ &= \frac{\partial}{\partial \lambda_g} (r_p^{1-p} H_h) \\ &= (1-p) r_p^{-p} \left( \frac{\partial}{\partial \lambda_g} r_p \right) H_h + r_p^{1-p} \frac{\partial}{\partial \lambda_g} H_h \\ &= (1-p) r_p^{1-2p} H_g H_h + (p+1) r_p^{1-p} G_{g,h}. \end{aligned}$$

450 where the first equality is due to the definition of the Hessian, the second equality is due to the  
451 expression of the gradient from Equation (19), the third equality applies the product rule to the  
452 derivative, and the fourth equality applies the definition of  $G_{g,h}$  in Lemma 7. This proves the second  
453 Equality of Lemma 7.

454 **Third derivatives.** Finally, we have,

$$\begin{aligned} \frac{\partial^3}{\partial \lambda_g \partial \lambda_h \partial \lambda_i} r_p &= \frac{\partial}{\partial \lambda_i} \mathcal{H}_{g,h} \\ &= \frac{\partial}{\partial \lambda_i} \{ (1-p) r_p^{1-2p} H_g H_h + (p+1) r_p^{1-p} G_{g,h} \} \\ &= (1-p) \frac{\partial}{\partial \lambda_i} \{ r_p^{1-2p} H_g H_h \} + (p+1) \frac{\partial}{\partial \lambda_i} \{ r_p^{1-p} G_{g,h} \} \end{aligned}$$

where the first equality is due to the definition of the Hessian, the second inequality is due to the Hessian expression established previously, and the third equality is due to the linearity of derivation. In a similar fashion to the previous case, we derivate each of the products  $r_p^{1-2p}H_gH_h$  and  $r_p^{1-p}G_{g,h}$  separately. On the one hand,

$$\begin{aligned}\frac{\partial}{\partial \lambda_i} \{r_p^{1-2p}H_gH_h\} &= H_gH_h \frac{\partial}{\partial \lambda_i} \{r_p^{1-2p}\} + r_p^{1-2p} \left( H_g \frac{\partial}{\partial \lambda_i} H_h + H_h \frac{\partial}{\partial \lambda_i} H_g \right) \\ &= H_gH_h(1-2p)r_p^{-2p}r_p^{1-p}H_i + r_p^{1-2p} (H_g(p+1)G_{h,i} + H_h(p+1)G_{g,i}) \\ &= (1-2p)r_p^{1-3p}H_gH_hH_i + (p+1)r_p^{1-2p} (H_gG_{h,i} + H_hG_{g,i}),\end{aligned}$$

where the first equality is due to the derivation product rule, the second equality is due to the definition of  $G_{g,h}$  introduced in Lemma 7, and the third equality is due to a reordering of the terms. On the other hand, we have by following the exact same steps

$$\begin{aligned}\frac{\partial}{\partial \lambda_i} \{r_p^{1-p}G_{g,h}\} &= (1-p)r_p^{-p} \frac{\partial}{\partial \lambda_i} r_p + r_p^{1-p} \frac{\partial}{\partial \lambda_i} G_{g,h} \\ &= (1-p)r_p^{-p}r_p^{1-p}H_iG_{g,h} + (p+2)r_p^{1-p}I_{g,h,i} \\ &= (1-p)r_p^{1-2p}H_iG_{g,h} + (p+2)r_p^{1-p}I_{g,h,i}.\end{aligned}$$

Then, we replace the previous two expressions in the formula for  $\frac{\partial^3}{\partial \lambda_g \partial \lambda_h \partial \lambda_i} r_p$  to obtain:

$$\begin{aligned}\frac{\partial^3}{\partial \lambda_g \partial \lambda_h \partial \lambda_i} r_p &= (1-p)(1-2p)H_gH_hH_i r_p^{1-3p} \\ &\quad + (1-2p)(1+p)(H_gG_{h,i} + H_hG_{i,g} + H_gG_{h,i}) \\ &\quad + r_p^{1-2p} + (p+1)(p+2)I_{g,h,i}r_p^{1-p}\end{aligned}$$

where we use the symmetry of  $G_{g,h} = G_{h,g}$ . This derives the third equation of Lemma 7 and concludes the proof.  $\square$

## A.2 Proof of Lemma 1

The proof of Lemma 1 consists of using optimality conditions on  $r_p$ :

**Lemma 1.** [Benchmark analysis] For each  $t \in \mathbb{N}$  and  $p \in [1, +\infty]$ , let  $n_{g,t}^* := \frac{\sigma_g^{\frac{2p}{p+1}} t}{\sum_{h \in [G]} \sigma_h^{\frac{2p}{p+1}}}$ . Then,

$$R_{p,t}^*(\sigma) = R_{p,t}(n_t^*, \sigma) = \frac{1}{t} R_{p,t}(n_1^*, \sigma). \quad (9)$$

*Proof.* From the definition of  $r_p$  in (14), we have

$$R_{p,T}^*(\sigma) = \inf_{\substack{n \in \mathbb{R}_+^G \\ \sum_{t=1}^T n_g = T}} R_{p,T}(n, \sigma) = \frac{1}{T} \inf_{\lambda \in \mathcal{K}} r_p(\lambda).$$

For any  $\lambda \in \mathcal{K} - \mathcal{K}^\circ$ , at least one element of the set  $\{\lambda_1, \dots, \lambda_{G-1}, 1 - \lambda_1 - \dots - \lambda_{G-1}\}$  should be 0, therefore for such a  $\lambda$ , we must have  $r_p(\lambda) = +\infty$ . Therefore  $\operatorname{argmin}_{\mathcal{K}} r_p = \operatorname{argmin}_{\mathcal{K}^\circ} r_p$ . Moreover, since  $r_p$  is differentiable in  $\mathcal{K}^\circ$ , we must also have  $\operatorname{argmin}_{\mathcal{K}^\circ} r_p \subset \nabla r_p^{-1}(\{0\})$ . Therefore,

$$\begin{aligned}\lambda \in \nabla r_p^{-1}(\{0\}) &\iff r_p^{1-p}(\lambda)(H_1(\lambda), \dots, H_{G-1}(\lambda)) = 0_{G-1} \\ &\iff H_1(\lambda) = \dots = H_{G-1}(\lambda) = 0 \\ &\iff \frac{\sigma_1^{2p}}{\lambda_1^{p+1}} = \dots = \frac{\sigma_{G-1}^{2p}}{\lambda_{G-1}^{p+1}} = \frac{\sigma_G^{2p}}{(1 - \lambda_1 - \dots - \lambda_{G-1})^{p+1}} \\ &\iff \forall g \in [G-1], \quad \lambda_g = \frac{\sigma_g^{\frac{2p}{p+1}}}{\sum_h \sigma_h^{\frac{2p}{p+1}}}.\end{aligned}$$

where the first equivalence is due to the expression of the gradient from Lemma 7, the second equivalence is due to  $r_p > 0$ , the third equivalence is due to the definition of  $H$  introduced in Lemma 7, and where we solve the system of equations in the last equivalence. Therefore there is a unique solution to  $\nabla r_p(\lambda) = 0$ . By continuity of  $r_p$  in the compact set  $\mathcal{K}$ ,  $\text{argmin}_{\mathcal{K}} r_p \neq \emptyset$ . Therefore the

minimum of  $r_p$  is attained exactly once at the point  $\left\{ \frac{\sigma_g^{\frac{2p}{p+1}}}{\sum_h \sigma_h^{\frac{2p}{p+1}}} \right\}_{g \in [G-1]}$ . Therefore by setting

$$\lambda_g^* := \frac{\sigma_g^{\frac{2p}{p+1}}}{\sum_h \sigma_h^{\frac{2p}{p+1}}}, \quad \forall g \in [G-1]$$

$$\lambda_G^* = 1 - \lambda_1^* - \dots - \lambda_{G-1}^* = \frac{\sigma_G^{\frac{2p}{p+1}}}{\sum_h \sigma_h^{\frac{2p}{p+1}}}$$

we have  $\lambda^* \in (\lambda - \lambda^*)_G$  and  $r_p(\{\lambda_g^*\}_{g \in [G-1]}) = \inf_{\lambda \in \mathcal{K}} r_p(\lambda) = TR_{p,T}^*(\sigma)$ . Lemma 1 follows by setting  $n^* := T\lambda^*$ .  $\square$

### A.3 Proof of Lemma 2

In this section, we establish the properties of  $\text{UCB}_t(\sigma_g)$ , which essentially from Assumption 1. Following the notations of Section 3, we introduce the following event:

$$\mathcal{A}_T := \bigcap_{g \in [G], 2 \leq t \leq T} \left\{ |\hat{\sigma}_{g,t} - \sigma_g| \leq \frac{C_T}{\sqrt{t}} \right\}$$

Based on Corollary 1 of [13], we have  $\mathbb{P}_\pi(\mathcal{A}_T) \geq 1 - 2GT^{-2.5}$ , and conditionally on  $\mathcal{A}_T$ ,

$$\forall g \in [G], t \geq 2G, \quad |\hat{\sigma}_{g,t} - \sigma_g| \leq \frac{C_T}{\sqrt{n_{g,t}}}.$$

We are now ready to prove Lemma 2.

**Lemma 2.** *With probability at least  $1 - \tilde{O}(T^{-2})$ ,*

$$0 \leq \text{UCB}_t(\sigma_g)^{\frac{2p}{p+1}} - \sigma_g^{\frac{2p}{p+1}} \leq \frac{4C_T}{\sqrt{n_{g,t}}} \frac{p}{p+1} \left( \sigma_g + \frac{2C_T}{\sqrt{n_{g,t}}} \right)^{\frac{p-1}{p+1}}.$$

*Proof.* Conditionally on  $\mathcal{A}_T$ , we have:

$$\begin{aligned} \text{UCB}_t(\sigma_g) &= \hat{\sigma}_{g,t} + \frac{C_T}{\sqrt{n_{g,t}}} \\ &= \sigma_g + \frac{C_T}{\sqrt{n_{g,t}}} + (\hat{\sigma}_{g,t} - \sigma_g) \\ &\in \sigma_g + \frac{C_T}{\sqrt{n_{g,t}}} + \left[ -\frac{C_T}{\sqrt{n_{g,t}}}, \frac{C_T}{\sqrt{n_{g,t}}} \right] \\ &= \sigma_g + \left[ 0, \frac{2C_T}{\sqrt{n_{g,t}}} \right], \end{aligned}$$

where the first equation is due to the definition of  $\text{UCB}_t$  introduced in (7), and the bounding is due to the definition of  $\mathcal{A}_T$ . Next, notice that the function  $x \rightarrow (\sigma_g + x)^{\frac{2p}{p+1}}$  is increasing, which implies that

$$\sigma_g^{\frac{2p}{p+1}} \leq \text{UCB}_t(\sigma_g)^{\frac{2p}{p+1}} \leq \left( \sigma_g + \frac{2C_T}{\sqrt{n_{g,t}}} \right)^{\frac{2p}{p+1}}, \quad (20)$$

which proves the leftmost inequality in Lemma 2. To prove the rightmost inequality, notice that  $x \rightarrow (\sigma_g + x)^{\frac{2p}{p+1}}$  is also convex, therefore by Jensen's inequality

$$\left( \sigma_g + \frac{2C_T}{\sqrt{n_{g,t}}} \right)^{\frac{2p}{p+1}} - \sigma_g^{\frac{2p}{p+1}} \leq \frac{2C_T}{\sqrt{n_{g,t}}} \frac{2p}{p+1} \left( \sigma_g + \frac{2C_T}{\sqrt{n_{g,t}}} \right)^{\frac{2p}{p+1}-1} = \frac{4C_T}{\sqrt{n_{g,t}}} \frac{p}{p+1} \left( \sigma_g + \frac{2C_T}{\sqrt{n_{g,t}}} \right)^{\frac{p-1}{p+1}},$$

which concludes the proof.  $\square$

#### 492 A.4 Proof of Lemma 3

493 The goal of this section is to prove Lemma 3, which consists of bounding with high probability  
 494  $n - n^*$ . To do so, we will design an alternative sequence  $\tilde{n}$ , that is simultaneously easy to analyze,  
 495 and upper bounds  $n$  with high probability. The motivation for the choice of  $\tilde{n}$  comes from the choice  
 496 of Variance-UCB.

497 We assume through the whole section what the event  $\mathcal{A}_T$  is achieved. For convenience, we view the  
 498 right hand side of Lemma 2 as a quantity of its own, and introduce the width function

$$w_g : x > 0 \rightarrow w_g(x) := \frac{4C_T}{\sqrt{x}} \frac{p}{p+1} \left( \sigma_g + \frac{2C_T}{\Sigma_p \sqrt{x}} \right)^{\frac{p-1}{p+1}},$$

499 so that the inequality in Lemma 2 can be rewritten as

$$0 \leq \text{UCB}_t(\sigma_g)^{\frac{2p}{p+1}} - \sigma_g^{\frac{2p}{p+1}} \leq \Sigma_p w_g(n_{g,t}). \quad (21)$$

500 We start by proving the following lemma, which follows from the decisions Variance-UCB makes:

501 **Lemma 8.** *For  $t \geq 2G$ , we have:*

$$n_{X_{t+1},t} - t w_{X_{t+1}}(n_{X_{t+1},t}) \leq n_{X_{t+1},t}^*$$

502 *Proof.* The proof exploits the greedy property of the algorithm. At  $t = 2G$ , each group is sampled  
 503 exactly twice, and we have  $\text{UCB}_{2G}(\sigma_g)^{\frac{2p}{p+1}} < +\infty$  for every group  $g \in [G]$ . By choice of  $X_{t+1}$ , we  
 504 must have:

$$\forall g \in [G], \quad \frac{\text{UCB}_t(\sigma_g)^{\frac{2p}{p+1}}}{n_{g,t}} \leq \frac{\text{UCB}_t(\sigma_{X_{t+1}})^{\frac{2p}{p+1}}}{n_{X_{t+1},t}} \quad (22)$$

505 On the one hand, from the leftmost inequality in (21), we have

$$\forall g \in [G], \quad \frac{\sigma_g^{\frac{2p}{p+1}}}{n_{g,t}} \leq \frac{\text{UCB}_t(\sigma_g)^{\frac{2p}{p+1}}}{n_{g,t}}. \quad (23)$$

506 On the other hand, from the rightmost inequality in (21), we have

$$\frac{\text{UCB}_t(\sigma_{X_{t+1}})^{\frac{2p}{p+1}}}{n_{X_{t+1},t}} \leq \frac{\sigma_{X_{t+1}}^{\frac{2p}{p+1}} + \Sigma_p w_{X_{t+1}}(n_{X_{t+1},t})}{n_{X_{t+1},t}}. \quad (24)$$

507 Therefore by combining both Inequalities (23) and (24) in Inequality (22), we obtain

$$\forall g \in [G], \quad \frac{\sigma_g^{\frac{2p}{p+1}}}{n_{g,t}} \leq \frac{\sigma_{X_{t+1}}^{\frac{2p}{p+1}} + \Sigma_p w_{X_{t+1}}(n_{X_{t+1},t})}{n_{X_{t+1},t}} \quad (25)$$

508 After multiplying both sides by  $n_{g,t} n_{X_{t+1},t}$  and summing over  $g \in [G]$ , we get:

$$\underbrace{n_{X_{t+1},t} \sum_{g \in [G]} \sigma_g^{\frac{2p}{p+1}}}_{=\Sigma_p} \leq \left( \sigma_{X_{t+1}}^{\frac{2p}{p+1}} + \Sigma_p w_{X_{t+1}}(n_{X_{t+1},t}) \right) \underbrace{\sum_{g \in [G]} n_{g,t}}_{=t}$$

509 we then divide both sides by  $\Sigma_p > 0$ , and use the formula  $n_{g,t}^* = \frac{\sigma_g^{\frac{2p}{p+1}}}{\Sigma_p} t$  (see Lemma 1) to obtain

$$n_{X_{t+1},t} \leq n_{X_{t+1},t}^* + t w_{X_{t+1}}(n_{X_{t+1},t})$$

510 Lemma 8 follows by subtracting  $w_{X_{t+1}}(n_{X_{t+1},t})$  from both sides.  $\square$

511 Lemma 8 states that the possible excess between the number of samples output by the algorithm and  
 512 the optimal number of samples is not too big, and can be controlled by the width  $w$ . Since the width  
 513 decreases in the number of samples, the function

$$x \rightarrow x - t w_g(x)$$

514 must be increasing and has therefore an inverse function that is also increasing, which we denote  
 515  $W_g^t(x)$ . We introduce the following sequence, which mimics the behavior stated in Lemma 8:

$$\begin{aligned}\tilde{n}_{g,t} &= n_{g,t} && \text{For } t = 1, \dots, 2G \\ \tilde{n}_{g,t+1} &= \tilde{n}_{g,t} + \mathbb{1}(\tilde{n}_{g,t} \leq W_g^t(n_{g,t}^*)) && \text{For } t \geq 2G\end{aligned}$$

516 The sequence is easier to analyze and upper bounds the true number of samples  $n$ :

517 **Lemma 9.** *We have  $\tilde{n} \geq n$ .*

518 *Proof.* By construction, the result holds for  $t = 1, \dots, 2G$ . Assume for the sake of contradiction that  
 519 the result does not hold for a  $g \in [G]$  and  $t + 1 > 2G$ , and take such a  $t$  minimal. For such a pair  
 520  $(g, t)$  We have:

$$\begin{aligned}\mathbb{1}(X_{t+1} = g) &= n_{g,t+1} - n_{g,t} \\ &> \tilde{n}_{g,t+1} - \tilde{n}_{g,t} \\ &= \mathbb{1}(\tilde{n}_{g,t} \leq W_g^t(n_{g,t}^*)) \\ &= \mathbb{1}(n_{g,t} \leq W_g^t(n_{g,t}^*)),\end{aligned}$$

521 where the first step follows from the definition of  $n$ , the second step follows from the minimality of  $t$ ,  
 522 the third step follows from the definition of  $\tilde{n}$ , and the last step follows from the minimality of  $t$ .

523 Therefore  $1 \geq \mathbb{1}(X_{t+1} = g) > \mathbb{1}(n_{g,t} \leq W_g^t(n_{g,t}^*)) \geq 0$ , which implies  $\mathbb{1}(X_{t+1} = g) = 1$  and  
 524  $\mathbb{1}(n_{g,t} \leq W_g^t(n_{g,t}^*)) = 0$ , so that

$$n_{X_{t+1},t} > W_g^t(n_{X_{t+1},t}^*).$$

525 By taking the inverse of the increasing function  $W_g^t$  on both sides in the previous equality, we get

$$n_{X_{t+1},t} - tw_{X_{t+1}}(n_{X_{t+1},t}) > n_{X_{t+1},t}^*,$$

526 contradicting Lemma 8. Therefore the assumption is wrong and  $\tilde{n} \geq n$ , which completes the  
 527 proof.  $\square$

528 **Lemma 10.** *For a fixed  $g$ , the sequence  $\{W_g^t(n_{g,t}^*)\}_{t \geq 1}$  is increasing. Consequently,*

$$\tilde{n}_{g,t} \leq W_g^t(n_{g,t}^*)^+ + 2$$

529 *Proof.* For a fixed  $x > 0$  and  $t \geq 1$ , we have

$$(x - (t+1)w_g(x)) - (x - tw_g(x)) = -w_g(x) < 0,$$

530 therefore the sequence of functions  $\{x \rightarrow x - tw_g(x)\}_{t \geq 1}$  is simply decreasing in  $t$ , therefore the  
 531 sequence of its inverse functions  $\{x \rightarrow W_g^t(x)\}_{t \geq 1}$  is simply increasing in  $t$ . Consequently,

$$W_g^{t+1}(n_{g,t+1}^*) \geq W_g^t(n_{g,t+1}^*). \quad (26)$$

532 Moreover, the function  $W_g^t$  is increasing in  $\mathbb{R}_+$ , thus

$$W_g^t(n_{g,t+1}^*) \geq W_g^t(n_{g,t}^*). \quad (27)$$

533 By combining Equations (26) and (27), we obtain

$$W_g^{t+1}(n_{g,t+1}^*) \geq W_g^t(n_{g,t}^*),$$

534 which proves that the sequence  $\{W_g^t(n_{g,t}^*)\}_{t \geq 1}$  is increasing, thus completing the proof for the first  
 535 part of Lemma 10.

536 We derive the second part by induction on  $t \geq 1$ . For  $t \leq 2G$ , the result holds immediately as  
 537  $\tilde{n}_{g,t} = n_{g,t}$  and  $n_{g,t} \leq 2$ . We assume the result holds for a  $t \geq 2G$ . We distinguish two cases:

538

- $\tilde{n}_{g,t} \leq W_g^t(n_{g,t}^*)$ : This implies that:

$$\begin{aligned}\tilde{n}_{g,t+1} &= \tilde{n}_{g,t} + 1 \\ &\leq W_g^t(n_{g,t}^*) + 1 \\ &\leq W_p^{t+1,g}(n_{g,t+1}^*) + 1 \\ &\leq W_p^{t+1,g}(n_{g,t+1}^*)^+ + 2,\end{aligned}$$

539

where the first step stems from the definition of  $\tilde{n}$ , the second step stems from the induction hypothesis, and the third step stems from the first part of the proof.

540

541

- $\tilde{n}_{g,t} > W_g^t(n_{g,t}^*)$ : This implies that:

$$\begin{aligned}\tilde{n}_{g,t+1} &= \tilde{n}_{g,t} \\ &\leq W_g^t(n_{g,t}^*)^+ + 2 \\ &\leq W_p^{t+1,g}(n_{g,t+1}^*)^+ + 2,\end{aligned}$$

542

where the first step stems from the definition of  $\tilde{n}$ , the second step stems from the induction hypothesis, and the third step stems from the first part of the proof.

543

544 Studying both cases concludes our induction and proves the inequality for all  $t \geq 1$ . This concludes  
545 the proof of Lemma 10.  $\square$

546 Next, we derive an upper bound on  $W_g^t$ :

547 **Lemma 11.** For  $x > 0$ , we have  $W_g^t(x) \leq \frac{x}{1 - t \frac{w_g(x)}{x}}$ .

548 *Proof.* Let  $x, y > 0$  with  $0 \leq y - tw_g(y) = x$ , so that  $y = W_g^t(x)$  by definition of  $W_g^t$ . we have:

$$\begin{aligned}\frac{x}{1 - t \frac{w_g(x)}{x}} &= \frac{y - tw_g(y)}{1 - t \frac{w_g(y - tw_g(y))}{x - tw_g(x)}} \\ &= y \frac{1 - t \frac{w_g(y)}{y}}{1 - t \frac{w_g(y - tw_g(y))}{y - tw_g(y)}} \\ &\geq y = W_g^t(x),\end{aligned}$$

549 which concludes the proof.  $\square$

550 We are now ready to prove Lemma 3.

551 **Lemma 3.** Variance-UCB collects a vector of samples  $n$  that, with probability at least  $1 - \tilde{O}(T^{-2})$ ,  
552 satisfies,

$$n_{g,T} - n_{g,T}^* \leq 3 + \frac{4C_T p}{\Sigma_p(p+1)} \left( \sigma_g + \frac{2C_T}{\sqrt{n_{g,T}^*}} \right)^{\frac{p-1}{p+1}} \sqrt{n_{g,T}^*} = \Theta(\sqrt{T}).$$

553 *Proof.* Conditionally on  $\mathcal{A}_T$ , all the previous lemmas stated in this section hold. Consequently,

$$\begin{aligned}n_{g,T} &\leq \tilde{n}_{g,T} \\ &\leq 2 + W_g^t(n_{g,T}^*)^+ \\ &\leq 2 + \frac{n_{g,T}^*}{1 - T \frac{w_g(n_{g,T}^*)}{n_{g,T}^*}} \\ &\leq 2 + n_{g,T}^* + 1 + Tw_g(n_{g,T}^*) \\ &= 3 + n_{g,T}^* + \frac{4C_T p}{\Sigma_p(p+1)} \left( \sigma_g + \frac{2C_T}{\sqrt{n_{g,T}^*}} \right)^{\frac{p-1}{p+1}} \sqrt{n_{g,T}^*},\end{aligned}$$

554 where the first step stems from Lemma 9, the second step stems from Lemma 10, the third step stems  
555 from first order approximations and the last step stems from Lemma 11.  $\square$

## 556 A.5 Proof of Lemma 4

557 We follow the notations from Appendix A.1. The goal of this section is to prove Lemma 4. We will  
 558 do so by combining the optimality of  $\lambda^*$  and by using the properties of  $R_{p,T}$  established in A.1.

559 **Lemma 4.** *Let  $\sigma \in \mathbb{R}_+^G$  and  $n' \in \mathbb{R}_+^G$  such that  $\sum_{g \in [G]} n'_g = T$ . Then,*

$$\begin{aligned} \frac{R_{p,T}(n', \sigma) - R_{p,T}(n^*, \sigma)}{R_{p,T}(n^*, \sigma)} &\leq \frac{p+1}{2} \sum_{g \in [G]} \frac{(n'_g - n_{g,T}^*)^2}{T n_{g,T}^*} + \frac{7(p+2)^2 \Sigma_p^2}{\sigma_{\min}^2} \max_g \left( \frac{n_{g,T}^*}{n'_g} \right)^{3p+3} \frac{\|n' - n^*\|_\infty^3}{T^3} \\ &= O\left( \frac{\|n - n^*\|_\infty^2}{T^2} R_p(\sigma) \right). \end{aligned}$$

560 *Proof.* For  $\lambda \in \mathcal{K}$  be fixed, from Taylor's inequality, we have

$$\left| r_p(\lambda) - r_p(\lambda^*) - \langle \lambda - \lambda^*, \nabla r_p(\lambda^*) \rangle - \frac{1}{2} \langle \mathcal{H}(\lambda^*)(\lambda - \lambda^*), \lambda - \lambda^* \rangle \right| \leq \|\lambda - \lambda^*\|_\infty^3 \sup_{\substack{u \in [\lambda, \lambda^*] \\ x, y, z \in \mathbb{N} \\ x+y+z=3 \\ \{g, h, i\} \subset [G-1]}} \left| \frac{1}{x!y!z!} \frac{\partial^3 r_p(u)}{\partial \lambda_g \partial \lambda_h \partial \lambda_i} \right|$$

561 We use the derivative formulas obtained in 7 to obtain simple forms for  $\nabla r_p(\lambda^*)$ ,  $\mathcal{H}(\lambda^*)$ , and  
 562  $\frac{\partial^3 r_p(u)}{\partial \lambda_g \partial \lambda_h \partial \lambda_i}$ . We start by upperbounding  $\frac{\partial^3 r_p(u)}{\partial \lambda_g \partial \lambda_h \partial \lambda_i}$ . From Lemma 1, we have for each  $g \in [G]$ :

$$\sigma_g^{2p} = \left( \sum_{h \in [G]} \sigma_h^{\frac{2p}{p+1}} \right)^{p+1} (\lambda_g^*)^{p+1} = \Sigma_p^{p+1} (\lambda_g^*)^{p+1}.$$

563 For a fixed  $u \in [\lambda, \lambda^*]$ ,  $\sum_g u_g = \sum_g \lambda_g = \sum_g \lambda_g^* = 1$ , thus the coordinate  $g_0$  achieving the  
 564 maximal  $\frac{\lambda_g^*}{u_g}$  must have  $u_{g_0} \leq \lambda_{g_0}^*$ . Since  $u \in [\lambda, \lambda^*]$  this implies that  $\lambda_{g_0} \leq u_{g_0} \leq \lambda_{g_0}^*$  and  
 565 consequently  $\max_g \frac{\lambda_g^*}{u_g} \leq \max_g \frac{\lambda_g^*}{\lambda_g}$ . Hence we get:

$$\begin{aligned} |H_g(u)| &= \Sigma_p^{p+1} \left| \left( \frac{\lambda_G^*}{u_G} \right)^{p+1} - \left( \frac{\lambda_g^*}{u_g} \right)^{p+1} \right| \leq \Sigma_p^{p+1} \left( \max_g \frac{\lambda_g^*}{\lambda_g} \right)^{p+1}, \\ |G_{g,h}(u)| &= \Sigma_p^{p+1} \left| \frac{(\lambda_G^*)^{p+1}}{(u_G)^{p+2}} + \frac{(\lambda_g^*)^{p+1}}{(u_g)^{p+2}} \mathbb{1}(g=h) \right| \leq \frac{2\Sigma_p^{p+1}}{\min_g \lambda_g^*} \left( \max_g \frac{\lambda_g^*}{\lambda_g} \right)^{p+2}, \\ |I_{g,h,i}(u)| &= \Sigma_p^{p+1} \left| \frac{(\lambda_G^*)^{p+1}}{(u_G)^{p+3}} - \frac{(\lambda_g^*)^{p+1}}{(u_g)^{p+3}} \mathbb{1}(g=h=i) \right| \leq \frac{\Sigma_p^{p+1}}{(\min_g \lambda_g^*)^2} \left( \max_g \frac{\lambda_g^*}{\lambda_g} \right)^{p+3}. \end{aligned}$$

566 Moreover, since  $p \geq 1$ , all  $1-p, 1-2p, 1-3p$  are non-positive, and for  $j \in 1-p, 1-2p, 1-3p$   
 567 we have from the minimality of  $\lambda^*$ :

$$r_p(u)^j \leq r_p(\lambda^*)^j = (\Sigma_p)^{\frac{1}{p}+1},$$



568 therefore:

$$\begin{aligned}
|H_g H_h H_i r_p^{1-3p}(u)| &\leq \left( \max_g \frac{\lambda_g^*}{\lambda_g} \right)^{3p+3} \Sigma_p^{3p+3} r_p(\lambda^*)^{1-3p} \\
&= \left( \max_g \frac{\lambda_g^*}{\lambda_g} \right)^{3p+3} \Sigma_p^{3p+3+(1-3p)(1+1/p)} \\
&= \left( \max_g \frac{\lambda_g^*}{\lambda_g} \right)^{3p+3} \Sigma_p^{1+1/p} \\
&= \left( \max_g \frac{\lambda_g^*}{\lambda_g} \right)^{3p+3} r_p(\lambda^*) \\
|(H_g G_{h,i} + H_h G_{i,g} + H_g G_{h,i}) r_p^{1-2p}(u)| &\leq 3 \frac{2\Sigma_p^{p+1}}{\min_g \lambda_g^*} \left( \max_g \frac{\lambda_g^*}{\lambda_g} \right)^{p+2} \left( \Sigma_p^{p+1} \left( \max_g \frac{\lambda_g^*}{\lambda_g} \right)^{p+1} \right) \\
&= \frac{6}{\min_g \lambda_g^*} \left( \max_g \frac{\lambda_g^*}{\lambda_g} \right)^{2p+3} \Sigma_p^{2p+2} r_p^{1-2p}(\lambda^*) \\
&= \frac{6}{\min_g \lambda_g^*} \left( \max_g \frac{\lambda_g^*}{\lambda_g} \right)^{2p+3} r_p(\lambda^*, \sigma) \\
|I_{g,h,i} r_p^{1-p}(u)| &\leq \frac{\Sigma_p^{p+1}}{(\min_g \lambda_g^*)^2} \left( \max_g \frac{\lambda_g^*}{\lambda_g} \right)^{p+3} r_p^{1-p}(\lambda^*) \\
&= \frac{1}{(\min_g \lambda_g^*)^2} \left( \max_g \frac{\lambda_g^*}{\lambda_g} \right)^{p+3} r_p(\lambda^*, \sigma)
\end{aligned}$$

569 Hence by using the expression of the third derivatives, we get:

$$\begin{aligned}
\left| \frac{\partial^3 r_p(u)}{\partial \lambda_g \partial \lambda_h \partial \lambda_i} \right| &\leq |(1-p)(1-2p)H_g H_h H_i r_p^{1-3p}(u)| \\
&\quad + |(1-2p)(1+p)(H_g G_{h,i} + H_h G_{i,g} + H_g G_{h,i}) r_p^{1-2p}(u)| \\
&\quad + |(p+1)(p+2)I_{g,h,i} r_p^{1-p}(u)| \\
&\leq 2p^2 \left( \max_g \frac{\lambda_g^*}{\lambda_g} \right)^{3p+3} r_p(\lambda^*) + \frac{12(p+1)^2}{\min_g \lambda_g^*} \left( \max_g \frac{\lambda_g^*}{\lambda_g} \right)^{2p+3} r_p(\lambda^*, \sigma) \\
&\quad + \frac{(p+2)^2}{(\min_g \lambda_g^*)^2} \left( \max_g \frac{\lambda_g^*}{\lambda_g} \right)^{p+3} r_p(\lambda^*, \sigma) \\
&\leq \frac{7(p+2)^2}{(\min_g \lambda_g^*)^2} \left( \max_g \frac{\lambda_g^*}{\lambda_g} \right)^{3p+3} r_p(\lambda^*).
\end{aligned}$$

570 As a consequence, by taking the sup over  $u, g, h, i, x, y, z$ , we get

$$\sup_{\substack{u \in [\lambda, \lambda^*] \\ x, y, z \in \mathbb{N} \\ x+y+z=3 \\ \{g, h, i\} \subset [G-1]}} \left| \frac{1}{x!y!z!} \frac{\partial^3 r_p(u)}{\partial \lambda_g \partial \lambda_h \partial \lambda_i} \right| \leq \frac{7(p+2)^2}{(\min_g \lambda_g^*)^2} \max_g \left( \frac{\lambda_g^*}{\lambda_g} \right)^{3p+3} r_p(\lambda^*) \quad (28)$$

571 We now simplify both  $\nabla r_p(\lambda^*)$  and  $\mathcal{H}(\lambda^*)$ . First, since  $\lambda^*$  is optimal and an interior point of  $\mathcal{K}$ , we  
572 have

$$\nabla r_p(\lambda^*) = 0_G \quad (29)$$

573 Setting the value  $\lambda^*$  in Equation (30) implies that for  $g, h \in [G]$ :

$$\mathcal{H}_{g,h}(\lambda^*) = (p+1)r_p^{1-p}(\lambda^*)G_{g,h}(\lambda^*)$$

574 From the definition of  $G_{g,h}$  we have:

$$G_{g,h}(\lambda^*) = \Sigma_p^{p+1} \left( \frac{1}{\lambda_G^*} + \frac{1}{\lambda_g^*} \mathbb{1}(g=h) \right)$$

575 Hence:

$$\mathcal{H}(\lambda^*) = (p+1)r_p^{1-p}(\lambda^*)\Sigma_p^{p+1}\left(\frac{1}{\lambda_G^*} + \frac{1}{\lambda_g^*}\mathbb{1}(g=h)\right) = (p+1)r_p(\lambda^*)\left(\frac{1}{\lambda_G^*} + \frac{1}{\lambda_g^*}\mathbb{1}(g=h)\right)$$

576 As a consequence,

$$\begin{aligned}\langle \mathcal{H}(\lambda^*)(\lambda - \lambda^*), \lambda - \lambda^* \rangle &= \sum_{g,h \in [G-1]} \mathcal{H}_{g,h}(\lambda - \lambda^*)_g(\lambda - \lambda^*)_h \\ &= (p+1)r_p(\lambda^*) \sum_{g,h \in [G-1]} \left(\frac{1}{\lambda_G^*} + \frac{1}{\lambda_g^*}\mathbb{1}(g=h)\right) (\lambda - \lambda^*)_g(\lambda - \lambda^*)_h \\ &= (p+1)r_p(\lambda^*) \left\{ \frac{\sum_{g,h \in [G-1]} (\lambda - \lambda^*)_g(\lambda - \lambda^*)_h}{\lambda_G^*} + \sum_{g \in [G-1]} \frac{(\lambda - \lambda^*)_g^2}{\lambda_g^*} \right\} \\ &= (p+1)r_p(\lambda^*) \left\{ \frac{\left(\sum_{g \in [G-1]} (\lambda - \lambda^*)_g\right)^2}{\lambda_G^*} + \sum_{g \in [G-1]} \frac{(\lambda - \lambda^*)_g^2}{\lambda_g^*} \right\} \\ &= (p+1)r_p(\lambda^*) \left\{ \frac{(\lambda - \lambda^*)_G^2}{\lambda_G^*} + \sum_{g \in [G-1]} \frac{(\lambda - \lambda^*)_g^2}{\lambda_g^*} \right\} \\ &= (p+1)r_p(\lambda^*) \sum_{g \in [G]} \frac{(\lambda_g - \lambda_g^*)^2}{\lambda_g^*},\end{aligned}$$

577 where the first step stems from the definition of the scalar product, and the second step stems from the  
578 expression of the Hessian we derived in Lemma 7. In the third step, we distribute the sum over the  
579 terms  $\frac{1}{\lambda_G^*}$  and  $\frac{1}{\lambda_g^*}\mathbb{1}(g=h)$ . In the fourth step, we factorize the first sum, and in the fifth step, we use  
580 that  $\sum_{g \in [G-1]} (\lambda - \lambda^*)_g = (1 - \lambda_G) - (1 - \lambda_G^*) = \lambda_G^* - \lambda_G$ . Therefore:

$$\frac{1}{2} \langle \mathcal{H}(\lambda^*)(\lambda - \lambda^*), \lambda - \lambda^* \rangle = \frac{p+1}{2} r_p(\lambda^*) \sum_{g \in [G]} \frac{(\lambda_g - \lambda_g^*)^2}{\lambda_g^*}. \quad (30)$$

581 Therefore, by combining Equations (29), (30) and Inequality (28), in Taylor Inequality 16, we get:

$$\left| \frac{r_p(\lambda, \sigma)}{r_p^*} - 1 - \frac{p+1}{2} \sum_{g \in [G]} \frac{(\lambda_g - \lambda_g^*)^2}{\lambda_g^*} \right| \leq \frac{7(p+2)^2}{(\min_g \lambda_g^*)^2} \max_g \left( \frac{\lambda_g^*}{\lambda_g} \right)^{3p+3} \|\lambda - \lambda^*\|_\infty^3.$$

582 The proof of Lemma 4 follows by setting  $n' = T\lambda$ ,  $n^* = T\lambda^*$ . In this case  $R_{p,T}(n', \sigma) = \frac{1}{T}r_p(\lambda)$   
583 and  $R_{p,T}^* = \frac{1}{T}r_p(\lambda^*)$ .  $\square$

## 584 A.6 Putting everything together

585 We are now ready to complete the proof of Theorem 1.

586 **Theorem 1.** For any  $\mathcal{D}$  that satisfies Assumptions 1 and 2 and for any finite  $p$ , the regret of Variance-  
587 UCB is at most  $\tilde{O}(T^{-2})$ , i.e.,

$$\text{Regret}_{p,T}(\text{Variance-UCB}, \mathcal{D}) = \tilde{O}(T^{-2}).$$

588 *Proof.* First, notice that

$$\begin{aligned}\text{Regret}_{p,T}(\text{Variance-UCB}) &= \mathbb{E}_\pi[R_{p,T}(n, \sigma) - R_{p,T}^*(\sigma)] \\ &= \mathbb{E}[R_{p,T}(n, \sigma) - R_{p,T}^*(\sigma) | \mathcal{A}_T] \mathbb{P}_\pi(\mathcal{A}_T) + \mathbb{E}[R_{p,T}(n, \sigma) - R_{p,T}^*(\sigma) | \mathcal{A}_T^c] \mathbb{P}_\pi(\mathcal{A}_T^c) \\ &\leq \mathbb{E}[R_{p,T}(n, \sigma) - R_{p,T}^*(\sigma) | \mathcal{A}_T] + \|\sigma^2\|_p \mathbb{P}_\pi(\mathcal{A}_T^c),\end{aligned}$$

where the first step stems from the definition of regret introduced in 5, the second step stems from the law of total expectation, and the third step stems from both  $\mathbb{P}(\mathcal{A}_T) \leq 1$  and  $R_{p,T}(n, \sigma) - R_{p,T}^*(\sigma) \leq \|\sigma^2\|_p$ . It remains to show that each term in the rightmost side is in  $\tilde{O}(T^{-2})$ . First, we know that  $\mathbb{P}_\pi(\mathcal{A}_T) \leq 2GT^{-2.5} = \tilde{O}(T^{-2})$ . Moreover, we have conditionally on  $\mathcal{A}_T$ :

$$\begin{aligned} \frac{R_{p,T}(n, \sigma) - R_{p,T}(n^*, \sigma)}{R_{p,T}(n^*, \sigma)} &\leq \frac{p+1}{2} \sum_{g \in [G]} \frac{(n_g - n_{g,T}^*)^2}{T n_{g,T}^*} + \frac{7(p+2)^2 \Sigma_p^2}{\sigma_{\min}^2} \max_g \left( \frac{n_{g,T}^*}{n_g} \right)^{3p+3} \frac{\|n - n^*\|_\infty^3}{T^3} \\ &\leq \frac{p+1}{2} \frac{G \|n - n^*\|_\infty^2}{T \min_g n_{g,T}^*} + \frac{7(p+2)^2 \Sigma_p^2}{\sigma_{\min}^2} \max_g \left( \frac{n_{g,T}^*}{n_g} \right)^{3p+3} \frac{\|n - n^*\|_\infty^3}{T^3}, \end{aligned}$$

where the first inequality stems from Lemma 4, and the second inequality stems from  $(n_{g,T} - n_{g,T}^*)^2 \leq \|n - n^*\|_\infty^2$ . Since  $\sum_g n_{g,T} = T$ , from Lemma 3 we have:

$$\begin{aligned} n_{g,T} - n_{g,T}^* &= - \sum_{h \neq g} n_{h,T} - n_{h,T}^* \\ &\geq -3(G-1) - \sum_{h \neq g} \frac{4C_T p}{\Sigma_p(p+1)} \left( \sigma_g + \frac{2C_T}{\sqrt{n_{h,T}^*}} \right)^{\frac{p-1}{p+1}} \sqrt{n_{h,T}^*} \\ &\geq -3(G-1) - G \max_h \frac{4C_T p}{\Sigma_p(p+1)} \left( \sigma_g + \frac{2C_T}{\sqrt{n_{h,T}^*}} \right)^{\frac{p-1}{p+1}} \sqrt{n_{h,T}^*} \\ &\geq -3G - \frac{4GC_T p}{\Sigma_p(p+1)} \left( \min \sigma_g + \frac{2C_T}{\sqrt{\min_h n_{h,T}^*}} \right)^{\frac{p-1}{p+1}} \sqrt{\min_h n_{h,T}^*}, \end{aligned}$$

where the first step stems from  $\sum_h n_{h,T} - n_{h,T}^* = \sum_h n_{h,T} - \sum_h n_{h,T}^* = T - T = 0$ , the second step stems from Lemma 3, and the last steps stem from taking the max over the sum. The last inequality implies

$$\|n - n^*\|_\infty \leq 3G + \frac{4GC_T p}{\Sigma_p(p+1)} \left( \min \sigma_g + \frac{2C_T}{\sqrt{\min_h n_{h,T}^*}} \right)^{\frac{p-1}{p+1}} \sqrt{\min_h n_{h,T}^*}. \quad (31)$$

In particular,  $\|n - n^*\|_\infty = \tilde{O}(\sqrt{\min_h n_{h,T}^*}) = \tilde{O}(\sqrt{T})$  and

$$\max_g \frac{n_{g,T}^*}{n_{g,T}} \leq \frac{1}{1 - \frac{\|n - n^*\|_\infty}{\min_h n_{h,T}^*}} = \frac{1}{1 - \tilde{O}(T^{-0.5})} = \tilde{O}(1).$$

Therefore,

$$\begin{aligned} \frac{p+1}{2} \frac{G \|n - n^*\|_\infty^2}{T \min_g n_{g,T}^*} + \frac{7(p+2)^2 \Sigma_p^2}{\sigma_{\min}^2} \max_g \left( \frac{n_{g,T}^*}{n_g} \right)^{3p+3} \frac{\|n - n^*\|_\infty^3}{T^3} &= \frac{p+1}{2} \frac{G \tilde{O}(T)}{T \Theta(T)} + \frac{7(p+2)^2 \Sigma_p^2}{\sigma_{\min}^2} \tilde{O}(1) \frac{\tilde{O}(T^{1.5})}{T^3} \\ &= \tilde{O}(T^{-1}). \end{aligned}$$

Recall from Lemma 1 that  $R_{p,T}(n^*, \sigma) = \Theta(T^{-1})$ . Thus by taking the conditional expectation on  $\mathcal{A}_T$ , we have

$$\mathbb{E}[R_{p,T}(n, \sigma) - R_{p,T}^*(\sigma) | \mathcal{A}_T] \leq \tilde{O}(T^{-1} R_{p,T}^*(\sigma)) = \tilde{O}(T^{-2}),$$

which concludes the proof of Theorem 1.  $\square$

## B Proof of Theorem 2

Through this section, we fix a policy  $\pi$ .

In this section, we give a proof to 2. First, we establish an initial lower bound that captures the trade-off between how hard it is to distinguish two instances and how hard it is to optimize both under the same action (B.1). Next, we provide a specific counter example which regret is at least  $\Theta(T^{-2})$  (B.2).

## 609 B.1 Proof of Lemma 6

610 **Lemma 6.** *Let  $\pi$  be a fixed policy and  $\mathcal{D}^a, \mathcal{D}^b$  be two instances with standard deviation vectors*  
 611  *$\sigma^a, \sigma^b$ , respectively. Then,*

$$\max\{\text{Regret}_{p,T}(\pi, \mathcal{D}^a), \text{Regret}_{p,T}(\pi, \mathcal{D}^b)\} \geq d(\sigma^a, \sigma^b) \exp\left(-\sum_{g \in [G]} \mathbb{E}_{\pi, \mathcal{D}^a}[n_{g,t}] KL(\mathcal{D}_g^a || \mathcal{D}_g^b)\right). \quad (11)$$

612 *Proof.* Let  $\mathcal{D}^a$  and  $\mathcal{D}^b$  be two instances with standard deviations  $\sigma^a$  and  $\sigma^b$ , and let  $\delta \geq d(\sigma^a, \sigma^b)$ .  
 613 Let  $X$  be a random variable over  $\{a, b\}$ , we have

$$\begin{aligned} \max(\text{Regret}_{p,T}(\pi, \mathcal{D}^a), \text{Regret}_{p,T}(\pi, \mathcal{D}^b)) &\geq \mathbb{E}_X[\text{Regret}_{p,T}(\pi, \mathcal{D}^X)] \\ &\geq \mathbb{E}[R_{p,T}(n, \sigma^X) - R_{p,T}^*(\sigma^X) | R_{p,T}(n, \sigma^X) - R_{p,T}^*(\sigma^X) > \delta] \\ &\times \mathbb{P}_{\pi, X}(R_{p,T}(n, \sigma^X) - R_{p,T}^*(\sigma^X) > \delta) \\ &\geq \delta \mathbb{P}_{X, \pi}(R_{p,T}(n, \sigma^X) - R_{p,T}^*(\sigma^X) > \delta) \end{aligned}$$

614 Let  $\hat{x}$  be the following (random) classifier:

$$\hat{x} := \begin{cases} a & \text{If } R_{p,T}(n, \sigma^a) - R_{p,T}^*(\sigma^a) \leq \delta \\ b & \text{If } R_{p,T}(n, \sigma^b) - R_{p,T}^*(\sigma^b) \leq \delta \\ \text{Indifferent} & \text{Otherwise} \end{cases}$$

615 Since  $\delta \geq d(\sigma^a, \sigma^b)$ ,  $\hat{x}$  is well defined. Moreover,  $\mathbb{P}_{\pi, X}(R_{p,T}(n, \sigma^X) - R_{p,T}^*(\sigma^X) > \delta) \geq$   
 616  $\mathbb{P}_X(\hat{x} \neq X) \geq \inf_{\hat{x}} \mathbb{P}_X(\hat{x} \neq X)$ , where the infimum is taken over all the classifiers of  $\{a, b\}$ .  
 617 Moreover, by Pinsker's inequality,  $\inf_{\hat{x}} \mathbb{P}_X(\hat{x} \neq X) \geq \exp(-KL(\mathcal{D}^a || \mathcal{D}^b))$ . Since we have  
 618 a bandits feedback, we have (see [29])  $KL(\mathcal{D}^a || \mathcal{D}^b) = \sum_{g \in [G]} \mathbb{E}_{\pi, \mathcal{D}^a}[n_{g,t}] KL(\mathcal{D}_g^a || \mathcal{D}_g^b)$ , which  
 619 concludes the proof of Lemma 6.  $\square$

## 620 B.2 The counter-examples

621 We recall the two instances we consider

$$\mathcal{D}^a : \begin{cases} \mathcal{D}_1^a \sim \mathcal{N}\left(0, 1 + \frac{1}{\sqrt{T}}\right) \\ \mathcal{D}_g^a \sim \mathcal{N}(0, 1), \quad \forall g \neq 1 \end{cases} \quad \mathcal{D}^b : \begin{cases} \mathcal{D}_2^b \sim \mathcal{N}\left(0, 1 + \frac{1}{\sqrt{T}}\right) \\ \mathcal{D}_g^b \sim \mathcal{N}(0, 1), \quad \forall g \neq 2 \end{cases}$$

622 We start by upper bounding the  $KL$ -divergence between the two instances:

623 **Lemma 12.** *We have:  $\mathbb{E}_{\pi, \mathcal{D}^a}[n_{1,T}] KL(\mathcal{D}_1^a || \mathcal{D}_1^b) + \mathbb{E}_{\pi, \mathcal{D}^a}[n_{2,T}] KL(\mathcal{D}_2^a || \mathcal{D}_2^b) \leq \frac{1}{2}$*

624 *Proof.* For convenience, we set  $\nu := \frac{1}{\sqrt{T}}$ . We use the formula for the  $KL$ -divergence of two  
 625 univariate normal distributions of zero mean:

$$KL(\mathcal{D}_1^a || \mathcal{D}_1^b) = \frac{1}{2} \left( \log\left(\frac{1+\nu}{1}\right) + \frac{1-(1+\nu)}{1+\nu} \right).$$

626 The Taylor expansion of the expression above can be derived by combining the expansions of both the  
 627 functions  $x \rightarrow \log(1+x)$  and  $x \rightarrow \frac{1}{1+x}$ :

$$\begin{aligned} \frac{1}{2} \left( \log\left(\frac{1+\nu}{1}\right) + \frac{1-(1+\nu)}{1+\nu} \right) &= \frac{1}{2} \left( -\sum_{k \geq 1} \frac{(-1)^k}{k} \nu^k - \nu \sum_{k \geq 0} (-1)^k \nu^k \right) \\ &= \frac{1}{2} \sum_{k \geq 1} (-1)^k \nu^k \left( 1 - \frac{1}{k} \right) \\ &= \frac{\nu^2}{2} \sum_{k \geq 0} (-1)^k \nu^k \left( 1 - \frac{1}{k+2} \right) \end{aligned}$$

628 Similarly,

$$\begin{aligned}
KL(\mathcal{D}_2^a || \mathcal{D}_2^b) &= \frac{1}{2} \left( \log \left( \frac{1}{1+\nu} \right) + \frac{1+\nu-1}{1} \right) \\
&= \frac{1}{2} (\nu - \log(1+\nu)) \\
&= \nu - \sum_{k \geq 1} \frac{(-1)^k}{k} \nu^k \\
&= \frac{\nu^2}{2} \sum_{k \geq 0} \frac{(-1)^k}{k+2} \nu^k
\end{aligned}$$

629 Therefore,

$$\begin{aligned}
\mathbb{E}_{\pi, \mathcal{D}^a} [n_{1,T}] KL(\mathcal{D}_1^a || \mathcal{D}_1^b) + \mathbb{E}_{\pi, \mathcal{D}^a} [n_{2,T}] KL(\mathcal{D}_2^a || \mathcal{D}_2^b) &\leq T (KL(\mathcal{D}_1^a || \mathcal{D}_1^b) + KL(\mathcal{D}_2^a || \mathcal{D}_2^b)) \\
&= \frac{T\nu^2}{2} \sum_{k \geq 0} \left( \frac{(-1)^k}{k+2} + 1 - \frac{(-1)^k}{k+2} \right) \nu^k \\
&= \frac{T\nu^2}{2} \sum_{k \geq 0} (-\nu)^k \\
&= \frac{T\nu^2}{2(1+\nu)} \\
&\leq \frac{T\nu^2}{2} \leq \frac{1}{2}
\end{aligned}$$

630 where we use in the first inequality that  $n_{1,T}, n_{2,T} \leq T$ . This concludes the proof.  $\square$

631 Next, we derive a simpler form for  $d_p(\sigma^a, \sigma^b)$ . We do so by exploiting the symmetries in  $\sigma^a, \sigma^b$ ,

632 **Lemma 13.** *Let  $\mathbf{u}_2$  denote the unit vector  $(1, 1)^T$ . We have:*

$$d_p(\sigma^a, \sigma^b) = r_p \left( \frac{1}{2} \mathbf{u}, \sigma^a \right) - r_p^*(\sigma^a)$$

633 *Proof.* For  $x \in \{a, b\}$ , let  $\mathcal{S}_\epsilon^x := \{\epsilon > 0 | r_p(\lambda, \sigma^x) - r_p^*(\sigma^x) \leq \epsilon\}$ . Recall that

$$d_p(\sigma^a, \sigma^b) = \inf \{ \delta \geq 0 | \mathcal{S}_\epsilon^a \cap \mathcal{S}_\epsilon^b \neq \emptyset \}$$

634 By symmetry of the problem, we have:

$$r_p^*(\sigma^a) = r_p^*(\sigma^b)$$

635 and for each  $(\lambda_1, \lambda_2, \lambda') \in \mathcal{K}$ :

$$r_p((\lambda_1, \lambda_2, \lambda'), \sigma^a) = r_p((\lambda_2, \lambda_1, \lambda'), \sigma^b)$$

636 On the one hand, if  $r_p(\frac{1}{2}\mathbf{u}, \sigma^a) - r^*(\sigma^a) \leq \epsilon$ , we must also have  $r_p(\frac{1}{2}\mathbf{u}, \sigma^b) - r^*(\sigma^b) \leq \epsilon$ , thus for  
637  $\epsilon \geq r_p(\frac{1}{2}\mathbf{u}, \sigma^a) - r^*(\sigma^a)$ , we have  $\mathcal{S}_\epsilon^a \cap \mathcal{S}_\epsilon^b \neq \emptyset$  and therefore  $d_p(\sigma^a, \sigma^b) \leq r_p(\frac{1}{2}\mathbf{u}, \sigma^a) - r^*(\sigma^a)$ .  
638 On the other hand, let  $\epsilon \geq 0$  such that  $\mathcal{S}_\epsilon^a \cap \mathcal{S}_\epsilon^b \neq \emptyset$ . Each of  $\mathcal{S}_\epsilon^a$  and  $\mathcal{S}_\epsilon^b$  is convex therefore  $\mathcal{S}_\epsilon^a \cap \mathcal{S}_\epsilon^b$   
639 is also convex. Let  $\lambda \in \mathcal{S}_\epsilon^a \cap \mathcal{S}_\epsilon^b$ . By symmetry properties we must also have  $1 - \lambda \in \mathcal{S}_\epsilon^a \cap \mathcal{S}_\epsilon^b$ ,  
640 and by convexity of the intersection, we must also have  $\frac{1}{2}\mathbf{u} = \frac{1}{2}(\lambda + (1 - \lambda)) \in \mathcal{S}_\epsilon^a \cap \mathcal{S}_\epsilon^b$ , therefore  
641  $\epsilon \geq r_p(\frac{1}{2}\mathbf{u}, \sigma^a) - r^*(\sigma^a)$ . By taking the inf we get  $d_p(\sigma^a, \sigma^b) \geq r_p(\frac{1}{2}\mathbf{u}, \sigma^a) - r^*(\sigma^a)$ , which  
642 concludes the proof.  $\square$

643 We are now ready to complete the proof of 2. It remains to show that  $d_p(\sigma^a, \sigma^b) = r_p(\frac{1}{2}\mathbf{u}, \sigma^a) -$   
644  $r_p^*(\sigma^a) = \Theta(T^{-2})$ .

645 Finally, we are ready to prove Theorem 2.

**Theorem 2.** Let  $p$  be finite. For any online policy  $\pi$ , there exists an instance  $\mathcal{D}_\pi$  such that for any  $T \geq 1$ ,

$$\text{Regret}_{p,T}(\pi, \mathcal{D}_\pi) \geq (p+1) \left( \kappa_0 - \frac{\kappa_p}{\sqrt{T}} \right) T^{-2},$$

where  $\kappa_0$  is a universal constant and  $\kappa_p$  is a constant that only depends on  $p$ .

*Proof.* For simplicity, we show the proof for  $G = 2$ . By using the proof of Lemma 4, we derive the following lower bound by setting  $n' = \frac{1}{2T} \mathbf{u}$ .

$$\frac{r_p\left(\frac{1}{2}\mathbf{u}, \sigma^a\right)}{r^*(\sigma^a)} - 1 \geq \frac{p+1}{2} \sum_{g \in \{1,2\}} \frac{\left(\frac{1}{2} - \lambda_g^*(\sigma^a)\right)^2}{\lambda_g^*(\sigma^a)} - \frac{7(p+2)^2}{(\min_g \lambda_g^*)^2} \max_g \left( \frac{\lambda_g^*}{1/2} \right)^{3p+3} \|\mathbf{u}/2 - \lambda^*\|_\infty^3. \quad (32)$$

it is convenient to write  $\nu = \frac{1}{2\sqrt{T}}$  and  $\lambda_1^*(\sigma^a) = \frac{1}{2} + f(\nu)$ . In this case  $\lambda_2^*(\sigma^a) = 1 - \lambda_1^*(\sigma^a) = \frac{1}{2} - f(\nu)$ . Thus:

$$\sum_{g \in \{1,2\}} \frac{\left(\frac{1}{2} - \lambda_g^*(\sigma^a)\right)^2}{\lambda_g^*(\sigma^a)} = f(\nu)^2 \sum_{g \in \{1,2\}} \frac{\frac{1}{2} + f(\nu) + \frac{1}{2} - f(\nu)}{\left(\frac{1}{2} + f(\nu)\right) \left(\frac{1}{2} - f(\nu)\right)} = \frac{f(\nu)^2}{\frac{1}{4} - f(\nu)^2}$$

Since  $\nu > 0$ , we must have  $\lambda_1^*(\sigma^a) > \lambda_2^*(\sigma^a)$ , therefore  $f(\nu) > 0$  and  $\min_g \lambda_g^* = \frac{1}{2} - f(\nu)$ ,  $\max_g \left( \frac{\lambda_g^*}{1/2} \right)^{3p+3} = \left( 1 + \frac{1}{2}f(\nu) \right)^{3p+3}$ . Finally  $\|\mathbf{u}/2 - \lambda^*\|_\infty = \max(f(\nu), -f(\nu)) = |f(\nu)| = f(\nu)$ . Therefore Equation 32 can be simplified into:

$$\frac{r_p\left(\frac{1}{2}\mathbf{u}, \sigma^a\right)}{r^*(\sigma^a)} - 1 \geq \frac{p+1}{2} \frac{f(\nu)^2}{\frac{1}{4} - f(\nu)^2} - \frac{7(p+2)^2}{\left(\frac{1}{2} - f(\nu)\right)^2} \left( 1 + \frac{1}{2}f(\nu) \right)^{3p+3} f(\nu)^3 \quad (33)$$

It remains to derive simpler bounds for  $f(\nu)$ . On the one hand, we have from Lemma 1:

$$\begin{aligned} f(\nu) &= \frac{(1+\nu)^{\frac{p}{p+1}}}{1 + (1+\nu)^{\frac{p}{p+1}}} - \frac{1}{2} \geq \frac{\sqrt{1+\nu}}{1 + \sqrt{1+\nu}} - \frac{1}{2} \\ &= \frac{1}{1 + (1+\nu)^{-1/2}} - \frac{1}{2} \\ &= \frac{1}{1 + 1 - \frac{1}{2}\nu + o(\nu)} - \frac{1}{2} \\ &= \frac{1}{2 - \frac{\nu + o(\nu)}{2}} - \frac{1}{2} \\ &= \frac{1}{2} \left( 1 + \frac{\nu + o(\nu)}{2} + o\left(\frac{\nu + o(\nu)}{2}\right) - 1 \right) \\ &= \frac{\nu}{4} + o(\nu). \end{aligned}$$

where the first step is due to  $p \rightarrow (1+\nu)^{\frac{p}{p+1}}$  is increasing in  $p \geq 1$ , and the next steps consist of deriving the first order approximation of  $\frac{\sqrt{1+\nu}}{1+\sqrt{1+\nu}} - \frac{1}{2}$ . Therefore, there exists a universal constant  $\kappa < +\infty$  such that  $\forall \nu \leq \frac{1}{2}$ :

$$f(\nu) \geq \kappa \nu.$$

On the other hand, we have for  $\nu \in [0, 1/2]$ :

$$\begin{aligned} \frac{(1+\nu)^{\frac{p}{p+1}}}{1 + (1+\nu)^{\frac{p}{p+1}}} - \frac{1}{2} &\leq \frac{1 + \frac{p}{p+1}\nu}{2 + \frac{p}{p+1}\nu} - \frac{1}{2} \\ &\leq \frac{1 + \frac{p}{p+1}\nu}{2} - \frac{1}{2} \\ &\leq \frac{1}{2}\nu \leq \frac{1}{4}, \end{aligned}$$

where the first inequality stems from  $(1+x)^{\frac{p}{p+1}} \leq 1 + \frac{p}{p+1}x$  for  $x \geq 0$ , the second inequality stems from  $\frac{p}{p+1}\nu \geq 0$ , and the last inequality stems from  $\frac{p}{p+1}\nu \leq \nu \leq 1/2$ . We replace the previous inequality into (33) to get:

$$\begin{aligned} \frac{r_p(\frac{1}{2}\mathbf{u}, \sigma^a)}{r^*(\sigma^a)} - 1 &\geq (p+1)\nu^2 \left( \frac{\kappa^2/2}{1/4-0} - \frac{7\frac{(p+2)^2}{p+1}}{(1/2-1/2 \times 1/4)^2} \left(1 + \frac{1/2}{4}\right)^{3p+3} \frac{\nu}{2} \right) \\ &\geq (p+1)\nu^2 \left( 2\kappa^2 - \frac{7(p+1)}{18/64} \left(\frac{9}{8}\right)^{3p+3} \nu \right) \\ &= 2\kappa^2(p+1)\nu^2 - \frac{7(p+1)^2}{18/64} \left(\frac{9}{8}\right)^{3p+3} \nu^3, \end{aligned}$$

where the second step stems from  $(p+2)^2 \geq p+1$ . Thus, for  $\nu \leq \frac{1}{2}$ , we have:

$$\frac{r_p(\frac{1}{2}\mathbf{u}, \sigma^a)}{r^*(\sigma^a)} - 1 \geq 2\kappa^2(p+1)\nu^2 - \frac{7(p+1)^2}{18/64} \left(\frac{9}{8}\right)^{3p+3} \nu^3 \quad (34)$$

We then use Inequality (34), Lemma 12 in the inequality stated in Lemma 6 to derive  $\forall \nu \leq \frac{1}{2}$ :

$$\max(\text{Regret}_{p,T}(\pi, \mathcal{D}^a), \text{Regret}_T(\pi, \mathcal{D}^b)) \geq \frac{1}{T} \left( 2\kappa^2(p+1)\nu^2 - \frac{7(p+1)^2}{18/64} \left(\frac{9}{8}\right)^{3p+3} \nu^3 \right)^+ \exp\left(-\frac{T\nu^2}{2}\right)$$

By recalling that  $\nu = \frac{1}{2\sqrt{T}} \leq \frac{1}{2}$ , we have:

$$\max(\text{Regret}_{p,T}(\pi, \mathcal{D}^a), \text{Regret}_T(\pi, \mathcal{D}^b)) \geq \frac{(p+1)}{T^2} \left( 2\kappa^2 - \frac{24(p+1)}{\sqrt{T}} \left(\frac{9}{8}\right)^{3p+3} \right)^+ \exp\left(-\frac{1}{8}\right)$$

which concludes the proof by setting  $\kappa_p := 24 \exp(-\frac{1}{8}) (p+1) (\frac{9}{8})^{3p+3}$  and  $\kappa_0 := 2 \exp(-\frac{1}{8}) \kappa^2$ .  $\square$

## C Upper and lower bounds when $p = \infty$

The proof for Theorem 3 (upper bound when  $p = \infty$ ) follows the same high-level steps as the proof of Theorem 1 (upper bound when  $p \in \mathbb{R}$ ). However, some adjustments of the proofs are necessary. Table 2 summarizes the changes that are required.

| Result                                   | Does it hold for $p = +\infty$ ? | Comments                                               |
|------------------------------------------|----------------------------------|--------------------------------------------------------|
| Lemma 1                                  | Yes                              | Proof needs modification                               |
| Lemmas 2, 3                              | Yes                              | Same proof                                             |
| Lemma 4                                  | No                               | Replaced by Lemma 14                                   |
| Lemmas 6, 12, 13                         | Yes                              | Same proof                                             |
| $d(\sigma^a, \sigma^b) = \Theta(T^{-2})$ | No                               | Replaced by $d(\sigma^a, \sigma^b) = \Theta(T^{-1.5})$ |

Table 2: Summary of the possible extensions to  $p = +\infty$

672

In Appendix C.1, we prove Lemma 1 for the case where  $p = +\infty$ . In Appendix C.2, we introduce and prove Lemma 14, the replacement for Lemma 4. In Appendix C.4, we prove Theorem 4.

### C.1 Extending Lemma 1

**Lemma 1.** [Benchmark analysis] For each  $t \in \mathbb{N}$  and  $p \in [1, +\infty]$ , let  $n_{g,t}^* := \frac{\sigma_g^{\frac{2p}{p+1}} t}{\sum_{h \in [G]} \sigma_h^{\frac{2p}{p+1}}}$ . Then,

$$R_{p,t}^*(\sigma) = R_{p,t}(n_t^*, \sigma) = \frac{1}{t} R_{p,t}(n_1^*, \sigma). \quad (9)$$

677 *Proof.* For the case where  $p = +\infty$ ,  $r_\infty$  is still continuous on  $\mathcal{S}_G$  and infinite whenever a coordinate  
 678 is zero. Therefore:

$$\emptyset \neq \operatorname{argmin}_{\mathcal{S}_G} r_\infty = \operatorname{argmin}_{\mathcal{S}_G \cap (\mathbb{R}_+^*)^G} r_\infty$$

679 Let  $\lambda \in \operatorname{argmin}_{\mathcal{S}_G} r_\infty$  with  $\lambda > 0$ . Set  $A := \{g \in [G] \mid \frac{\sigma_g^2}{\lambda_g} \text{ is maximal}\}$  and  $B := G - A$ . For the  
 680 sake of contradiction, we assume that  $B \neq \emptyset$  and let us consider an element  $g \in B$ . We will construct  
 681 a  $\lambda' \in \mathcal{S}_G$  satisfying  $r_\infty(\lambda') < r_\infty(\lambda)$  and contradicting the minimality of  $\lambda$ . First, set:

$$\kappa := \frac{\frac{\lambda_g}{\sigma_g^2} - \frac{\sum_{a \in A} \lambda_a}{\sum_{a \in A} \sigma_a^2}}{\frac{1}{\sum_{a \in A} \sigma_a^2} + \frac{1}{\sigma_g^2}}$$

682 and for each  $h \in [G]$ , set:

$$\lambda'_h = \begin{cases} \lambda_h & \text{for } h \in B - \{g\} \\ \lambda_h + \frac{\sigma_h^2}{\sum_{a \in A} \sigma_a^2} \kappa & \text{for } h \in A \\ \lambda_h - \kappa & \text{for } h = g \end{cases}$$

683 Note that:

$$\sum_{h \in [G]} \lambda'_h = \sum_{h \in [G]} \lambda_h + \sum_{h \in A} \frac{\sigma_h^2}{\sum_{a \in A} \sigma_a^2} \kappa - \kappa = \sum_{h \in [G]} \lambda_h = 1$$

684 Let us now prove that  $\lambda' > 0$ . For  $h \in B - \{g\}$ , the result is true since  $\lambda'_h = \lambda_h \geq 0$ . Moreover, by  
 685 construction of  $A$  and  $g$ , we have for each  $h \in A$ :

$$\frac{\lambda_g}{\sigma_g^2} > \frac{\lambda_h}{\sigma_h^2} = \frac{\sum_{a \in A} \lambda_a}{\sum_{a \in A} \sigma_a^2}$$

686 In particular,  $\kappa > 0$  and  $\lambda'_h > 0$  for each  $h \in A$ . Lastly, we have

$$\begin{aligned} \lambda'_g &= \lambda_g - \kappa = \frac{1}{\frac{1}{\sum_{a \in A} \sigma_a^2} + \frac{1}{\sigma_g^2}} \left( \frac{\lambda_g}{\sigma_g^2} + \frac{\lambda_g}{\sum_{a \in A} \sigma_a^2} - \left( \frac{\lambda_g}{\sigma_g^2} - \frac{\sum_{a \in A} \lambda_a}{\sum_{a \in A} \sigma_a^2} \right) \right) \\ &= \frac{1}{\frac{1}{\sum_{a \in A} \sigma_a^2} + \frac{1}{\sigma_g^2}} \left( \frac{\lambda_g + \sum_{a \in A} \lambda_a}{\sum_{a \in A} \sigma_a^2} \right) > 0 \end{aligned}$$

687 We next prove that  $r_\infty(\lambda', \sigma) < r_\infty(\lambda, \sigma)$ . For  $h \in B - \{g\}$ , we have:

$$\frac{\sigma_h^2}{\lambda'_h} = \frac{\sigma_h^2}{\lambda_h} < r_\infty(\lambda, \sigma)$$

688 Next, we have for any  $a \in A$ ,  $\frac{\sigma_a^2}{\lambda_a} = r_\infty(\lambda, \sigma)$ , thus:

$$\frac{\sigma_h^2}{\lambda'_h} = \frac{\sigma_h^2}{\lambda_h + \frac{\sigma_h^2}{\sum_{a \in A} \sigma_a^2} \kappa} = \frac{1}{\underbrace{\frac{\lambda_h}{\sigma_h^2}}_{= \frac{1}{r_\infty(\lambda, \sigma)}} + \underbrace{\frac{1}{\sum_{a \in A} \sigma_a^2} \kappa}_{> 0}} < r_\infty(\lambda, \sigma)$$

689 Finally, by choice of  $\kappa$ , we have:

$$\frac{\sigma_g^2}{\lambda'_g} = \frac{\sum_{a \in A} \sigma_a^2}{\sum_{a \in A} \lambda'_a} < r_\infty(\lambda, \sigma)$$

690 Therefore  $r_\infty(\lambda', \sigma) = \max_{h \in [G]} \frac{\sigma_h^2}{\lambda'_h} < r_\infty(\lambda, \sigma)$ , contradicting the minimality of  $\lambda$ . Hence our  
 691 assumption is wrong and  $B = \emptyset$ , or equivalently,  $A = [G]$ , which implies that for any possible  
 692 minimizer  $\lambda$ , we must have:

$$\forall g, h \in [G], \quad \frac{\sigma_g^2}{\lambda_g} = \frac{\sigma_h^2}{\lambda_h}$$

693 which implies that  $\operatorname{argmin} r_\infty = \{\lambda^*(\infty)\}$

694 □



## 695 C.2 Extending Lemma 4 to $R_\infty$

696 The upper bound Lemma 4 goes to  $+\infty$  as  $p = +\infty$  and is no longer insightful. In this section, we  
 697 provide a suitable bound:

698 **Lemma 14.** *Let  $\sigma \in \mathbb{R}_+^G$  and  $n' \in \mathbb{R}_+^G$  such that  $\sum_{g \in [G]} n'_g = T$ . Then, We have:*

$$\frac{R_\infty(n', \sigma)}{R_{\infty, T}^*(\sigma)} \leq 1 + \max_g \left| 1 - \frac{n'_{g, T}}{n_{g, T}^*} \right| + \max_g \left( \frac{n_{g, T}^*}{n'_{g, T}} \right)^3 \max_g \left| 1 - \frac{n_{g, T}^*}{n'_{g, T}} \right|^2$$

699 *Proof.* □

700 From Lemma 1, we have:

$$\frac{\sigma_1^2}{\lambda_1^*} = \dots = \frac{\sigma_G^2}{\lambda_G^*} = r_\infty^*$$

701 Thus for  $g \in [G]$ , we have:

$$\begin{aligned} \frac{\sigma_g^2}{\lambda_g} &\leq r_\infty^* + \left| \frac{\sigma_g^2}{\lambda_g} - \frac{\sigma_g^2}{\lambda_g^*} \right| \\ &\leq r_\infty^* + \frac{\sigma_g^2}{(\lambda_g^*)^2} |\lambda_g - \lambda_g^*| + \sigma_g^2 \max \left( \frac{1}{\lambda_g}, \frac{1}{\lambda_g^*} \right)^3 |\lambda_g - \lambda_g^*|^2 \\ &\leq r_\infty^* \left( 1 + \max_g \left| 1 - \frac{\lambda_g}{\lambda_g^*} \right| + \max_g \left( \frac{\lambda_g^*}{\lambda_g} \right)^3 \max_g \left| 1 - \frac{\lambda_g}{\lambda_g^*} \right| \right) \end{aligned}$$

702 The proof follows from taking the maximum over  $g \in [G]$  and setting  $n^* = T\lambda^*$ , and  $n' = T\lambda$ .

## 703 C.3 Proof of Theorem 3

704 **Theorem 3.** *For any  $\mathcal{D}$  that satisfies Assumptions 1 and 2,*

$$\text{Regret}_{\infty, T}(\text{Variance-UCB}, \mathcal{D}) = \tilde{O}(T^{-3/2}).$$

705 *Proof.* Similarly to Appendix A.6, we decompose the regret into two terms, and Inequality (??) still  
 706 holds:

$$\text{Regret}_{\infty, T}(\text{Variance-UCB}) \leq \mathbb{E}[R_{\infty, T}(n, \sigma) - R_{\infty, T}^*(\sigma) | \mathcal{A}_T] + \|\sigma^2\|_\infty \mathbb{P}_\pi(\mathcal{A}_T^c). \quad (35)$$

707 We now show that each term in the right hand side of 35 is in  $\tilde{O}(T^{-1.5})$ . We have  $\mathbb{P}_\pi(\mathcal{A}_T^c) =$   
 708  $\tilde{O}(T^{-1.5})$ . It remains to show that  $\mathbb{E}[R_{\infty, T}(n, \sigma) - R_{\infty, T}^*(\sigma) | \mathcal{A}_T] = \tilde{O}(T^{-1.5})$ . For this, we apply  
 709 Lemma 14 for  $n_T$ . Conditionally on  $\mathcal{A}_T$ , we have:

$$\frac{R_\infty(n_T, \sigma)}{R_\infty^*(\sigma)} \leq 1 + \max_g \left| 1 - \frac{n_{g, T}}{n_{g, T}^*} \right| + \max_g \left( \frac{n_{g, T}^*}{n_{g, T}} \right)^3 \max_g \left| 1 - \frac{n_{g, T}^*}{n_{g, T}} \right|^2 \quad (36)$$

$$\leq 1 + \frac{\|n_T - n_T^*\|_\infty}{\min_g n_{g, T}^*} + \max_g \left( \frac{n_{g, T}^*}{n_{g, T}} \right)^3 \frac{\|n_T - n_T^*\|_\infty^2}{(\min_g n_{g, T}^*)^2} \quad (37)$$

710 From Lemma 1,  $\min_g n_{g, T}^* = \Theta(T)$  and that  $R_{\infty, T}^*(\sigma) = \Theta(T^{-1})$ . From A.6, we know that  
 711  $\|n_T - n_T^*\|_\infty = \tilde{O}(\sqrt{T})$  and that  $\frac{n_{g, T}^*}{n_{g, T}} = \tilde{O}(1)$ . Therefore, conditionally on  $\mathcal{A}_T$ ,

$$\begin{aligned} R_\infty(n_T, \sigma) - R_{\infty, T}^*(\sigma) &\leq \left( \frac{\|n_T - n_T^*\|_\infty}{\min_g n_{g, T}^*} + \max_g \left( \frac{n_{g, T}^*}{n_{g, T}} \right)^3 \frac{\|n_T - n_T^*\|_\infty^2}{(\min_g n_{g, T}^*)^2} \right) R_{\infty, T}^*(\sigma) = \tilde{O} \left( \frac{R_{\infty, T}^*(\sigma)}{\sqrt{T}} \right) \\ &= \tilde{O} \left( \frac{T^{-1}}{\sqrt{T}} \right) = \tilde{O}(T^{-1.5}). \end{aligned}$$

712 Where the terms in  $\tilde{O}$  do not depend on the randomness of Variance-UCB, but only on the instance  
 713 of the problem. Therefore by taking the conditional expectation on  $\mathcal{A}_T$  we get  $\mathbb{E}[R_{\infty, T}(n, \sigma) -$   
 714  $R_{\infty, T}^*(\sigma) | \mathcal{A}_T] = \tilde{O}(T^{-1.5})$ , which completes the proof. □

715 **C.4 Proof of Theorem 4**

716 **Theorem 4.** *For any online policy  $\pi$ , there exists an instance  $\mathcal{D}_\pi$  such that for any  $T \geq 1$ ,*

$$\text{Regret}_{\infty, T}(\pi, \mathcal{D}_\pi) \geq \frac{2}{5}T^{-3/2}.$$

717 *Proof.* Notice that Lemmas 6, 12 and 13 still hold for  $p = +\infty$ . Similarly to the proof for Theorem  
 718 2, it remains to derive a lower bound on  $r_\infty\left(\frac{1}{2}\mathbf{u}, \sigma^a\right) - r_\infty^*(\sigma^a)$ . We have for  $\frac{1}{2\sqrt{T}} \leq \frac{1}{2}$ ,

$$\begin{aligned} r_\infty\left(\frac{1}{2}\mathbf{u}, \sigma^a\right) &= \max\left(\frac{(\sigma_1^a)^2}{1/2}, \frac{(\sigma_2^a)^2}{1/2}\right) \\ &= \max\left(\frac{1 + \frac{1}{2\sqrt{T}}}{1/2}, \frac{1}{1/2}\right) \\ &= 2\left(1 + \frac{1}{2\sqrt{T}}\right) \\ r_\infty(\sigma^a) &= (\sigma_1^a)^2 + (\sigma_2^a)^2 \\ &= 2 + \frac{1}{2\sqrt{T}} \end{aligned}$$

719 therefore:

$$r_\infty\left(\frac{1}{2}\mathbf{u}, \sigma^a\right) - r_\infty^*(\sigma^a) = 2\left(1 + \frac{1}{2\sqrt{T}}\right) - \left(2 + \frac{1}{2\sqrt{T}}\right) = \frac{1}{2\sqrt{T}} \quad (38)$$

720 We replace 38 and the inequality from Lemma 12 in the inequality from Lemma 6 to derive:

$$\max(\text{Regret}_{\infty, T}(\pi, \mathcal{D}^a), \text{Regret}_{\infty, T}(\pi, \mathcal{D}^b)) \geq \frac{\frac{1}{2\sqrt{T}}}{T} \exp\left(\frac{-T \frac{1}{2\sqrt{T}}^2}{2}\right)$$

721 thus we obtain:

$$\max(\text{Regret}_{\infty, T}(\pi, \mathcal{D}^a), \text{Regret}_{\infty, T}(\pi, \mathcal{D}^b)) \geq \frac{\exp(-1/8)}{2T\sqrt{T}} \geq \frac{2/5}{T\sqrt{T}}$$

722

□
